# Supplementary material
Source: publisher site journal article supplement (https://www.dovepress.com/article/588393)
Supplement: Supplementary file 1 [file 588393%20Supplementary%20Tables.docx]

**Supplemental Tables**

**Table S1. Numerical data (mean ± SD) corresponding to Figure 1**

| **Group**  **Experiment** | **Sham** | **RA** | **PRF/1min** | **PRF/2min** | **PRF/3min** |
| --- | --- | --- | --- | --- | --- |
| Ankle Diameter (mm) | 8.98±0.35 | 11.35±0.55 | 10.45±0.67 | 9.43± 0.09 | 9.63± 0.18 |
| Times (s) | 9.81±0.47 | 2.78± 0.24 | 4.77± 0.27 | 7.58± 0.31 | 7.29± 0.37 |
| Mankin Score | 0.33±0.52 | 10.83±0.75 | 8.33±1.03 | 3.50±0.55 | 5.50±0.55 |
| OARSI Score | 0.17±0.26 | 4.5±0.55 | 2.67±0.52 | 0.75±0.27 | 1.5±0.55 |

**Table S2. Numerical data (mean ± SD) corresponding to Figure 2**

| **Group**  **Experiment** | **Sham** | **RA** | **PRF/1min** | **PRF/2min** | **PRF/3min** |
| --- | --- | --- | --- | --- | --- |
| TNF-α | 60.83±5.02 | 726.66±46.23 | 410.56±16.92 | 317.47±16.63 | 315.33±30.91 |
| IL-6 | 37.01±5.34 | 101.22±4.97 | 63.44±4.66 | 49.59±4.83 | 53.35±2.93 |
| IL-1β | 19.74±3.51 | 142.38±9.56 | 88.54±5.59 | 61.12±10.95 | 64.09±15.33 |
| IHC (Ki67) | 4.92±1.89 | 48.67±5.26 | 27.12±2.77 | 13.48±2.22 | 17.03±3.33 |

**Table S3. Numerical data (mean ± SD) corresponding to Figure3**

| **Group**  **Experiment** | **Sham** | **RA** | **PRF/1min** | **PRF/2min** | **PRF/3min** |
| --- | --- | --- | --- | --- | --- |
| TRPA1(Western blot) | 1±0.10 | 3.56±0.15 | 2.43±0.12 | 1.51±0.12 | 1.65±0.08 |
| TRPV1(Western blot) | 1±0.08 | 3.12±0.14 | 2.05±0.16 | 1.36±0.14 | 1.51±0.04 |
| TRPA1(qPCR) | 1.01±0.05 | 2.84±0.13 | 2.24±0.11 | 1.64±0.10 | 1.75±0.06 |
| TRPV1(qPCR) | 1.02±0.05 | 6.15±0.31 | 3.26±0.20 | 1.98±0.13 | 2.06±0.10 |
| TRPV1+TRPA1+ (IF) | 3.33±0.58 | 39.00±1.88 | 19.79±1.01 | 12.85±1.51 | 14.89±1.86 |
